# Supplementary material for: The discriminant power of RNA features for pre-miRNA recognition
Source: Springer Nature journal article supplement (doi:10.1186/1471-2105-15-124), 2014-05-02

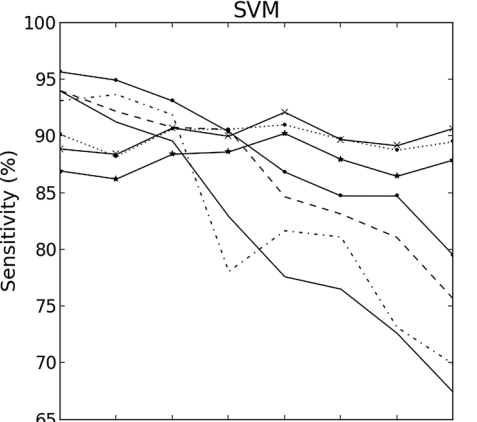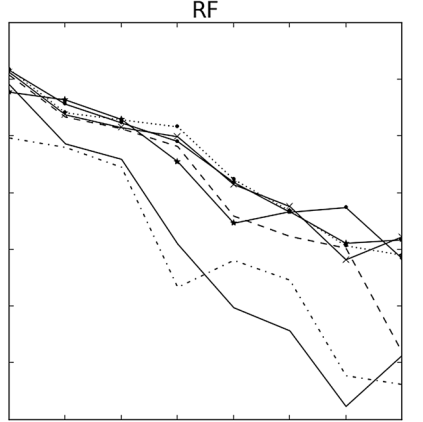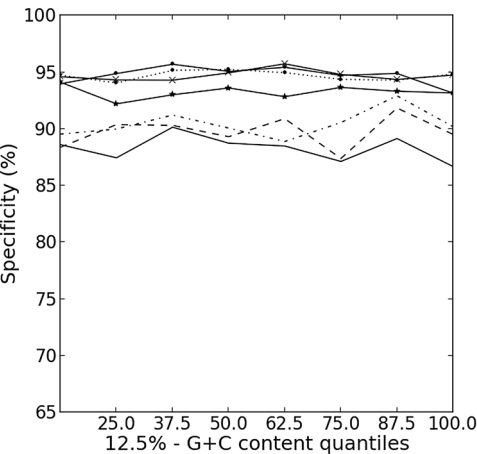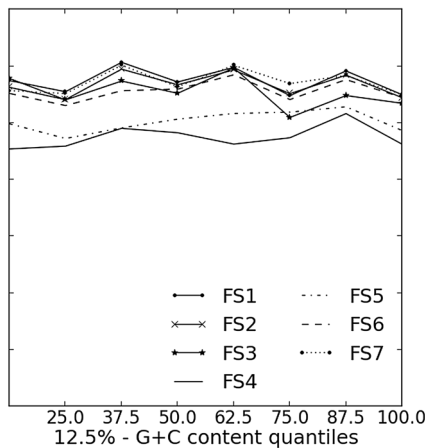

Supplement: 12859_2013_6833_MOESM2_ESM.pdf [file 12859_2013_6833_MOESM2_ESM.pdf]
